# Supplementary material
Source: PubMed Central journal article supplement (PMC2603608)
Supplement: NIHMS65487-supplement-01.pdf [file NIHMS65487-supplement-01.pdf]

Molecular Cell, Volume 31

## Supplemental Data

### An Unusual Allosteric Mobility of the C-Terminal

### Helix of a High-Affinity $\alpha_L$ Integrin I

### Domain Variant Bound to ICAM-5

Hongmin Zhang, Jose M. Casasnovas, Moonsoo Jin, Jin-huan Liu, Carl G. Gahmberg, Timothy A. Springer, and Jia-huai Wang

#### Figure S1. Packing of ICAM-5/dm-I in the crystals

Symmetry related complexes are shown along a screw axis  $2_1$ .  $\alpha 7$  helix of the I domain swings out and fits into the groove of a symmetry related I domain.

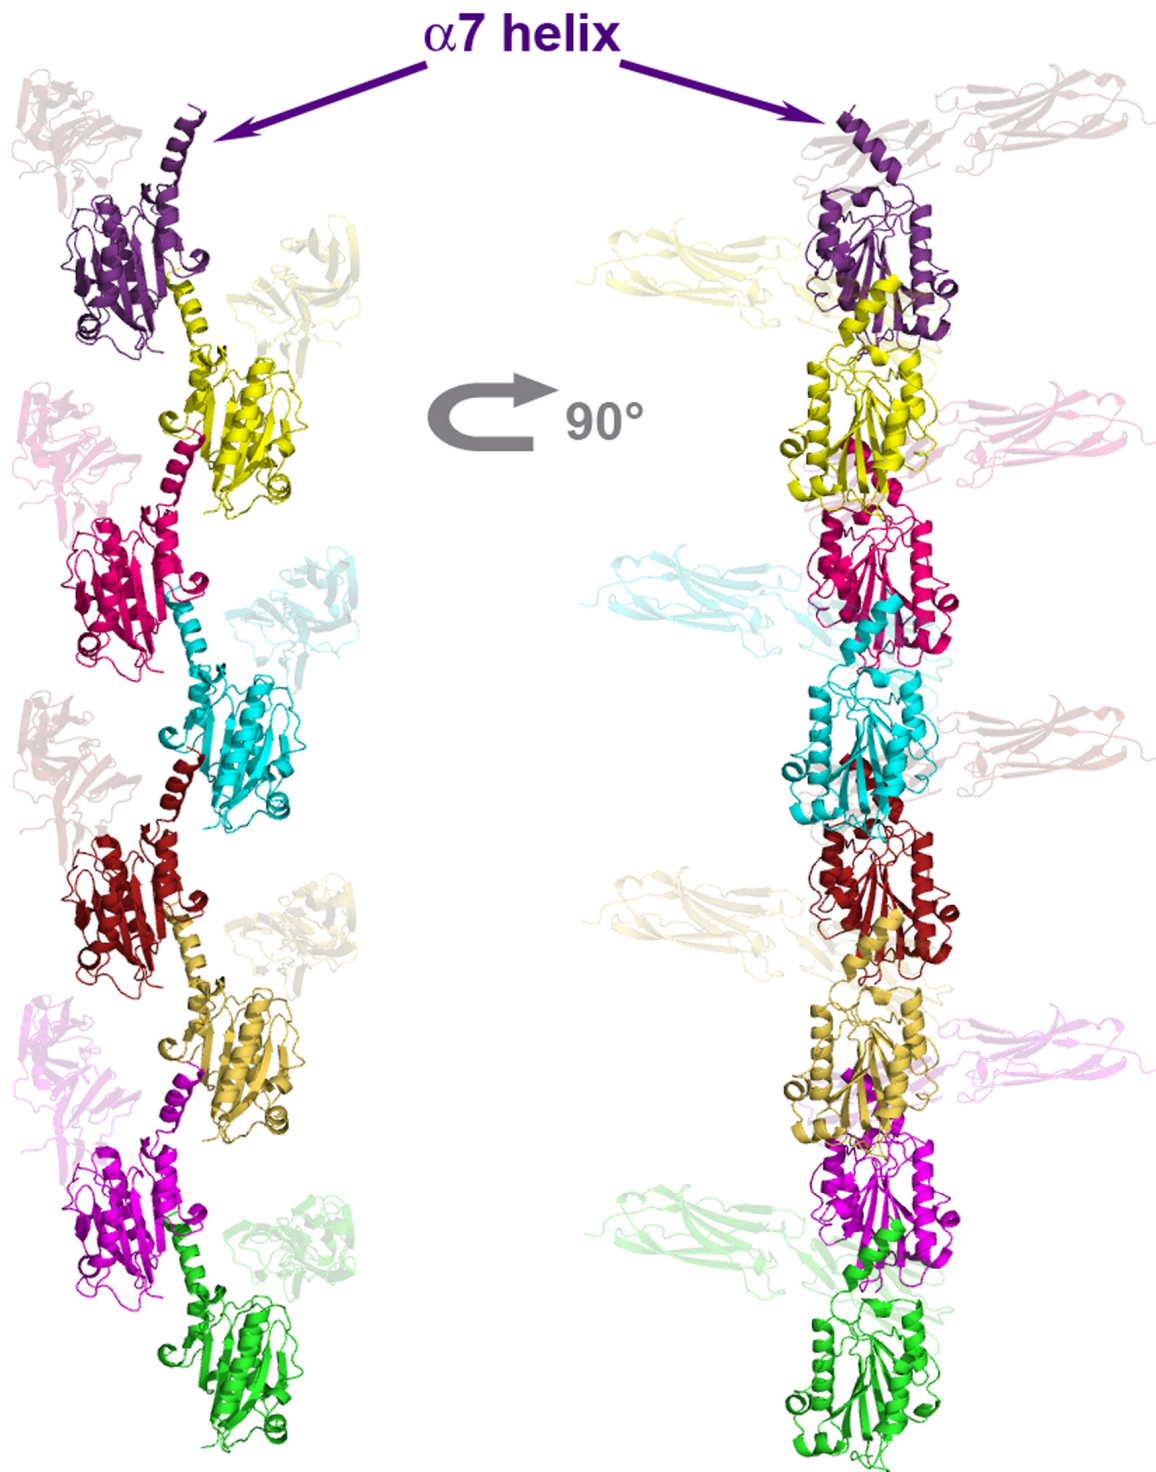

## Figure S2. Surface representations of the binding face of ICAM-1, ICAM-3 and ICAM-5

Negatively and positively charged residues are colored red and blue, respectively. Hydrophobic and neutral hydrophilic residues are colored grey and yellow, respectively. Some important residues are labeled. This figure is prepared with GRASP (Nicholls et al., 1991).

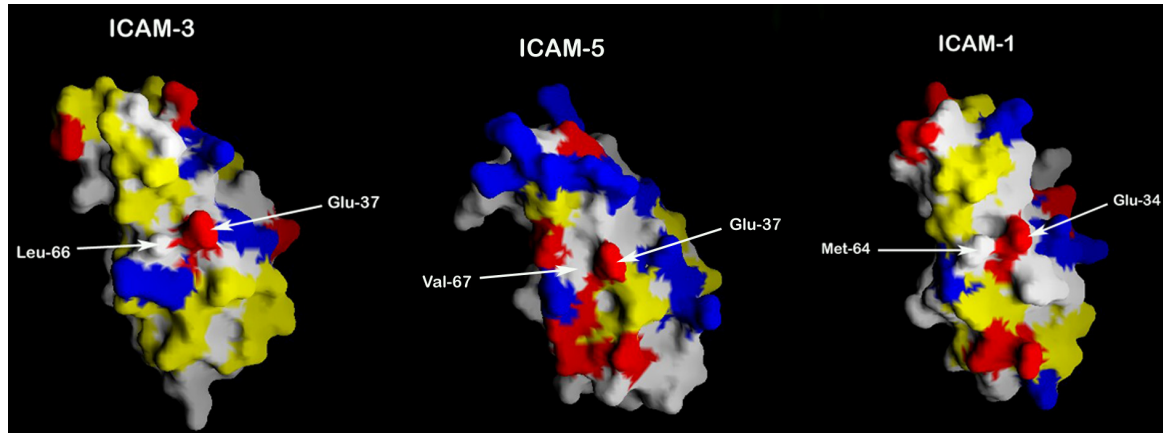

### Supplemental Reference

Nicholls, A., Sharp, K.A., and Honig, B. (1991). Protein folding and association: insights from the interfacial and thermodynamic properties of hydrocarbons. *Proteins* 11, 281–296.
